# Supplementary material
Source: HighWire-hosted journal article supplement (https://bjgp.org/highwire/filestream/46344/field_highwire_adjunct_files/0/BJGP.2020.0887_suppl.pdf)
Supplement: BJGP.2020.0887_suppl.pdf [file BJGP.2020.0887_suppl.pdf]

## Supplementary file 1: Allocation algorithm

Ages, quinquennial ages (ending in 0 or 5), and practice location were split between groups (using a random number generator) as follows:

1. Patients of different ages were systematically split between Group 1 and Group 2, in order to ensure that mean age was approximately equal in both groups (see Table S1).
2. The quinquennial ages (ending in 0/5) were systematically split separately (see Table S1), since letter invitations are sent to people in Southwark when they reach one of these milestones, so these were the patients who were likely to have already received a letter invitation in 2015 and who might be most likely to respond to a prompt.
3. The 43 practices were divided into two groups depending on whether they were in North Southwark or South Southwark, so randomisation could be stratified across these two areas with differing levels of deprivation, with half in each area assigned to Group 1 and half to Group 2. Which of Group 1 and Group 2 was assigned to intervention and control was reversed across the two areas, to ensure the maximum number of permutations of age and locality across conditions.

Table S1. Assignment of patients of different ages to intervention and control

|    |     | General Ages |     | Milestone Ages |     |
|----|-----|--------------|-----|----------------|-----|
| 40 | IG1 | 52           | IG1 | 64             | IG1 |
| 41 | IG2 | 53           | IG2 | 66             | IG2 |
| 42 | IG1 | 54           | IG1 | 67             | IG1 |
| 43 | IG2 | 56           | IG2 | 68             | IG2 |
| 44 | IG1 | 57           | IG1 | 69             | IG1 |
| 46 | IG2 | 58           | IG2 | 71             | IG2 |
| 47 | IG1 | 59           | IG1 | 72             | IG1 |
| 48 | IG2 | 61           | IG2 | 73             | IG2 |
| 49 | IG1 | 62           | IG1 | 74             | IG1 |
| 51 | IG2 | 63           | IG2 |                |     |

IG1 = Intervention Group 1, IG2 = Intervention Group 2
